# Supplementary material for: Hsp70 and Hsp110 Chaperones Promote Early Steps of Proteasome Assembly
Source: MDPI journal article supplement (doi:10.3390/biom13010011), 2022-12-21
Supplement: s1 [file s1]

**Table S1** - Strains used in this work

| strain name | genotype                                                                          | Derivative of | reference    |
|-------------|-----------------------------------------------------------------------------------|---------------|--------------|
| AM136       | <i>MATa PRE2 (β5)-HA::Ylplac211</i>                                               | JD47-13C      | this work    |
| AM200       | <i>MATa ump1Δ::HIS3MX6 sse1Δ::KanMX6</i>                                          | JD47-13C      | this work    |
| AM198-1D    | <i>MATa pba3Δ::kan sse1Δ::Kan</i>                                                 | JD47-13C      | this work    |
| BY4741      | <i>MATa his3-Δ1 leu2-Δ0, met15-Δ0 ura3-Δ0</i>                                     | "WT"          | Euroscarf    |
| CM2         | <i>MATa PRE6 (α4)-HA::Ylplac211</i>                                               | JD47-13C      | this work    |
| CM3         | <i>MATa PRE6 (α4)-HA::Ylplac211 ssa1-ts45 ssa2Δ::LEU2 ssa3Δ::TRP1 ssa4Δ::LYS2</i> | JB568         | this work    |
| CM5         | <i>MATa PRE6 (α4)-HA::Ylplac211 sse1Δ::KanMX4</i>                                 | BY4741        | this work    |
| CM13        | <i>MATa PRE6 (α4)-HA::Ylplac211</i>                                               | BY4741        | this work    |
| CM14        | <i>MATa PRE6 (α4)-HA::Ylplac211</i>                                               | JN54          | this work    |
| CM24        | <i>MATα PRE6 (α4)-HA::Ylplac211 sse1/2Δp414TEFsse1-G205D</i>                      | W303          | this work    |
| CM25        | <i>MATα PRE6 (α4)-HA::Ylplac211 sse1/2Δp414TEFSSE1WT</i>                          | W303          | this work    |
| CM29        | <i>MATa P<sub>GAL1</sub>PRE6-(α4)-HA::Ylplac211</i>                               | BY4741        | this work    |
| CM30        | <i>MATa P<sub>GAL1</sub>PRE6-(α4)-HA::Ylplac211 sse1Δ::kanMX4</i>                 | BY4741        | this work    |
| CM45        | <i>MATα rpn4Δ::HIS3MX6</i>                                                        | ML163         | this work    |
| CM46        | <i>MATa rpn4Δ::HIS3MX6 sse1Δ::KanMX4</i>                                          | BY4741        | this work    |
| CM54        | <i>MATa PUP1 (β2)-HA::Ylplac211</i>                                               | BY4741        | this work    |
| CM55        | <i>MATa PUP1 (β2)-HA::Ylplac211 sse1Δ::KanMX4</i>                                 | BY4741        | this work    |
| CM61        | <i>MATa PUP3 (β3)-HA::Ylplac211</i>                                               | JD47-13C      | this work    |
| CM143       | <i>MATa pre9Δ::KanMX4 sse1Δ::HIS3MX6</i>                                          | Y04765        | this work    |
| CM90        | <i>MATa PBA2-HA::Ylplac211</i>                                                    | JD47-13C      | this work    |
| CM128       | <i>MATa PRE4 (β7)-HA::Ylplac211</i>                                               | JD47-13C      | this work    |
| CM134       | <i>MATa P<sub>GALS</sub>SCL1::kanMX4 PRE6-2HA::Ylplac211</i>                      | JD47-13C      | this work    |
| CM152       | <i>MATa PRE7 (β6)-HA::Ylplac211</i>                                               | JD47-13C      | this work    |
| CM182       | <i>MATa PRE8 (α2)-HA::Ylplac211 sse1Δ::TRP1</i>                                   | PR93          | this work    |
| CM185       | <i>MATa SCL1 (α1)-HA::Ylplac211 sse1Δ::TRP1</i>                                   | PR93          | this work    |
| CM199       | <i>MATa P<sub>GALS</sub>-PRE6 (α4)::KanMX6 SCL1 (α1)-HA::Ylplac211</i>            | JD47-13C      | this work    |
| CM252       | <i>MATα SCL1 (α1)-HA::Ylplac211 ssa2Δ::LEU2 ssa3Δ::TRP1 ssa4Δ::LYS2</i>           | JN516         | this work    |
| CM253       | <i>MATa SCL1 (α1)-HA::Ylplac211 ssa1-ts45 ssa2Δ::LEU2 ssa3Δ::TRP1 ssa4Δ::LYS2</i> | JB568         | this work    |
| CM272       | <i>MATα PRE6 (α4)-HA::Ylplac211 ssa1Δ::HIS3 ssa2Δ::LEU2</i>                       | MW123         | this work    |
| FP6         | <i>MATa PRE3 (β1)-HA::Ylplac211</i>                                               | JD47-13C      | Pardelha, FP |
| FP8         | <i>MATa PRE6 (α4)-HA::Ylplac211 pre9Δ::HIS3MX6</i>                                | JD305         | Pardelha, FP |
| FP14        | <i>MATa PRE6 (α4)-HA::Ylplac211 pre9Δ::HIS3MX6 sse1Δ::TRP1</i>                    | JD305         | Pardelha, FP |
| FP16        | <i>MATa PBA4-HA::Ylplac211</i>                                                    | JD47-13C      | Pardelha, FP |
| JB568       | <i>MATa ssa1-ts45 ssa2Δ::LEU2 ssa3Δ::TRP1 ssa4Δ::LYS2</i>                         | JN54          | [41]         |
| JN54        | <i>MATa his3-11,3-15 leu2-3,2-112 lys2 trp1-Δ1 ura3-52</i>                        | "WT"          | [41]         |
| JN516       | <i>MATα ssa2Δ::LEU2 ssa3Δ::TRP1 ssa4Δ::LYS2</i>                                   | JN54          | [41]         |
| JD47-13C    | <i>MATa his3-Δ200 leu2-3,112 lys2-801 trp1-Δ63 ura3-52</i>                        | "WT"          | [21]         |
| JD59        | <i>MATa ump1Δ::HIS3MX6</i>                                                        | JD47-13C      | [8]          |
| JD127       | <i>MATa PRE1 (β4)-HA::Ylplac211 UMP1-HA::Ylplac128</i>                            | JD47-13C      | [8]          |
| JD129       | <i>MATa UMP1-HA::Ylplac128</i>                                                    | JD47-13C      | [8]          |
| JD139       | <i>MATa PUP1 (β2)-HA::Ylplac211</i>                                               | JD47-13C      | [8]          |
| JD183       | <i>MATa PRE10 (α7)-HA::Ylplac211</i>                                              | JD47-13C      | this work    |
| JD305       | <i>MATa pre9Δ::HIS3MX6</i>                                                        | JD47-13C      | this work    |
| JM5         | <i>MATa PRE8 (α2)-HA::Ylplac128</i>                                               | JD47-13C      | this work    |
| JM6         | <i>MATa PRE9 (α3)-HA::Ylplac211</i>                                               | JD47-13C      | this work    |
| JM9         | <i>MATa PUP2 (α5)-HA::Ylplac211</i>                                               | JD47-13C      | this work    |
| JM10        | <i>MATa PRE5 (α6)-HA::Ylplac211</i>                                               | JD47-13C      | this work    |
| JM12        | <i>MATa PRE6 (α4)-F6H::Ylplac204 PRE8 (α2)-HA::Ylplac128</i>                      | JD47-13C      | this work    |
| JM15        | <i>MATa PRE6 (α4)-HA::Ylplac211 PRE5 (α6)-HA::LEU2</i>                            | JD47-13C      | this work    |
| JM17        | <i>MATa SCL1 (α1)-HA::Ylplac211</i>                                               | JD47-13C      | this work    |
| ML163       | <i>MATα his3-Δ1 leu2-Δ0, lys-Δ0 ura3-Δ0 trp1-Δ0</i>                               | BY4742        | London, M    |
| MW123       | <i>MATα leu2Δ trp ura3 his3 lys2 ssa1Δ::HIS3 ssa2Δ::LEU2</i>                      | JN54          | [21]         |
| PG24        | <i>MATa PRE6 (α4)-HA::Ylplac211 ump1Δ::HIS3MX6</i>                                | JD47-13C      | Gouveia, P   |
| PG25        | <i>MATa UMP1-HA::Ylplac128</i>                                                    | BY4741        | Gouveia, P   |
| PR93        | <i>MATa sse1Δ::TRP1</i>                                                           | JD47-13C      | this work    |
| PR102       | <i>MATa pba1Δ::HIS3MX6 sse1Δ::TRP1</i>                                            | JD47-13C      | this work    |
| PR108       | <i>MATa PRE6 (α4)-HA::Ylplac211 pba1Δ::HIS3MX6 sse1Δ::TRP1</i>                    | PR102         | this work    |
| PR110       | <i>MATa PRE6 (α4)-HA::Ylplac211 pba3Δ::HIS3MX6 sse1Δ::TRP1</i>                    | JD47-13C      | this work    |
| PR118       | <i>MATa pba1Δ::HIS3MX6</i>                                                        | JD47-13C      | this work    |
| PR122       | <i>MATα PRE6 (α4)-HA::Ylplac211</i>                                               | JN516         | this work    |
| PR125       | <i>MATa PRE6 (α4)-HA::Ylplac211 sse1Δ::TRP1</i>                                   | JD47-13C      | this work    |
| PR126       | <i>MATa PRE9 (α3)-HA::Ylplac211 sse1Δ::TRP1</i>                                   | PR93          | this work    |
| PR127       | <i>MATa PUP2 (α5)-HA::Ylplac211 sse1Δ::TRP1</i>                                   | JD47-13C      | this work    |
| PR129       | <i>MATa pba1Δ::HIS3MX6 PRE6 (α4)-HA::Ylplac211</i>                                | JD47-13C      | this work    |
| PR132       | <i>MATa PRE6 (α4)-HA::Ylplac211 pba3Δ::HIS3MX6</i>                                | JD47-13C      | this work    |
| PR135       | <i>MATa PRE6 (α4)-HA::Ylplac211 sse1Δ::kanMX6 ump1Δ::HIS3MX6</i>                  | JD47-13C      | this work    |
| PR170       | <i>MATa SCL1 (α1)-HA::Ylplac211</i>                                               | JN54          | this work    |
| W303        | <i>MATa ade2-1 trp can1-100 leu2-3,112 his3-11,-15 ura3</i>                       | "WT"          | [40]         |
| Y01576      | <i>MATa pba3Δ::KanMX4</i>                                                         | BY4741        | Euroscarf    |
| Y02146      | <i>MATa sse1Δ::KanMX4</i>                                                         | BY4741        | Euroscarf    |
| Y04765      | <i>MATa pre9Δ::KanMX4</i>                                                         | BY4741        | Euroscarf    |

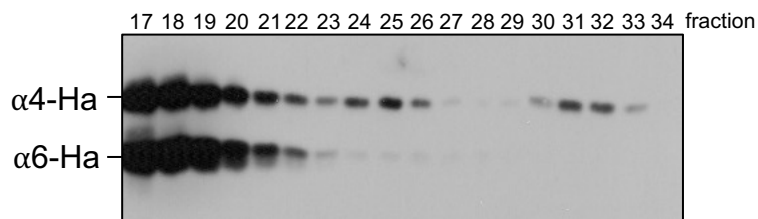

**Figure S1.** Gel filtration analysis of  $\alpha 4$  and  $\alpha 6$ . A strain was generated expressing both  $\alpha 4$  and  $\alpha 6$  in an HA-tagged form. Gel filtration (Superdex200) and anti-HA western blot analysis was done as described in Figure 1.

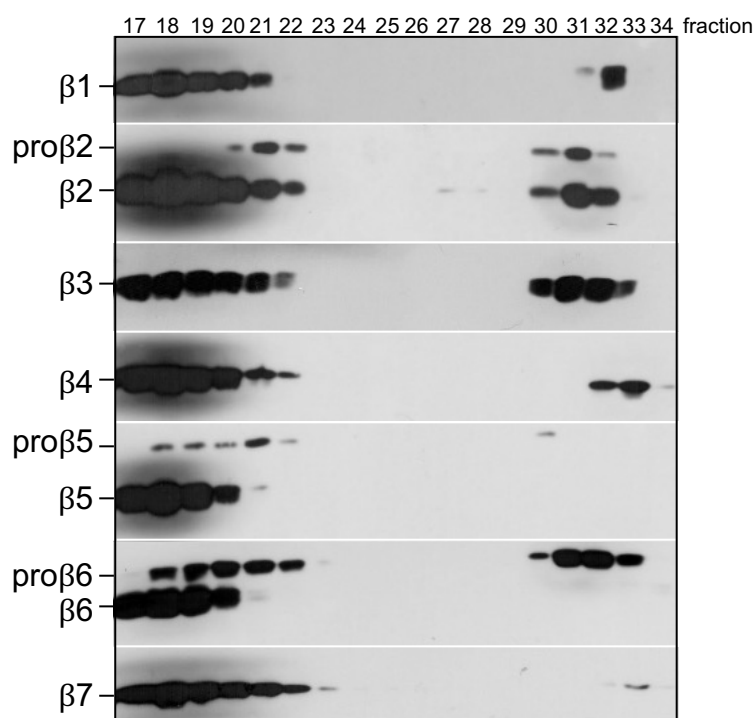

**Figure S2.** Gel filtration analysis of  $\beta$  subunits. Strains expressing HA-tagged versions of the seven distinct  $\beta$  subunits were used to analyze complexes formed by these subunits by Superdex200 gel filtration and anti-HA western blotting as described in Figure 1. The positions of the mature and unprocessed (pro) form of the  $\beta$  subunits are indicated on the left.

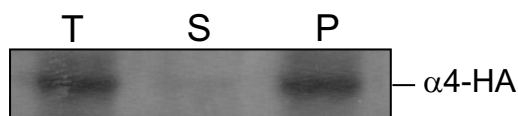

**Figure S3.** The subunit  $\alpha 4$  synthesized in *E. coli* is largely insoluble. Total protein extract (T) from a bacteria strain overexpressing  $\alpha 4$ -HA was analyzed by SDS-PAGE. (S) Soluble material. (P) Material found in the pellet.
